# Supplementary material for: Fully reproducible, low-temperature synthesis of high-quality, few-layer graphene on nickel via preheating of gas precursors using atmospheric pressure chemical vapor deposition
Source: Royal Society of Chemistry journal article supplement (doi:10.1039/c4ta03876b), 2014-01-01
Supplement: c4ta03876b1.pdf [file c4ta03876b1.pdf]

## Supplemental information

### Fully reproducible, low-temperature synthesis of high-quality, few-layer graphene on nickel via preheating of gas precursors using atmospheric pressure chemical vapor deposition

Miriam Somekh, Efrat Shawat, and Gilbert D. Nessim\*

#### Raman data ( $I_D/I_G$ ) from fifteen graphene growth experiments without preheating and with preheating

The corresponding distribution plot of  $I_D/I_G$  can be found in the text

| Exp. #             | No Preheating |       |       | With Preheating |       |       |
|--------------------|---------------|-------|-------|-----------------|-------|-------|
|                    | stdv          | stdv% |       | stdv            | stdv% |       |
| 1                  | 0.45          | 0.035 | 7.8%  | 0.14            | 0.031 | 22.8% |
| 2                  | 1.70          | 0.196 | 11.6% | 0.15            | 0.037 | 24.8% |
| 3                  | 1.05          | 0.028 | 2.7%  | 0.14            | 0.028 | 20.4% |
| 4                  | 0.76          | 0.044 | 5.8%  | 0.17            | 0.021 | 12.1% |
| 5                  | 1.03          | 0.061 | 5.9%  | 0.14            | 0.041 | 29.5% |
| 6                  | 0.62          | 0.047 | 7.6%  | 0.13            | 0.038 | 30.1% |
| 7                  | 0.63          | 0.171 | 27.0% | 0.12            | 0.055 | 45.6% |
| 8                  | 0.71          | 0.114 | 16.0% | 0.11            | 0.024 | 21.5% |
| 9                  | 0.67          | 0.070 | 10.3% | 0.11            | 0.040 | 35.7% |
| 10                 | 0.82          | 0.068 | 8.3%  | 0.29            | 0.072 | 24.4% |
| 11                 | 1.75          | 0.095 | 5.4%  | 0.02            | 0.014 | 67.6% |
| 12                 | 0.88          | 0.141 | 16.1% | 0.03            | 0.022 | 74.0% |
| 13                 | 0.88          | 0.047 | 5.3%  | 0.17            | 0.044 | 25.6% |
| 14                 | 0.90          | 0.047 | 5.2%  | 0.37            | 0.098 | 26.3% |
| 15                 | 0.41          | 0.107 | 26.3% | 0.29            | 0.087 | 30.1% |
| Average D/G        | 0.88          |       |       | 0.16            |       |       |
| Standard deviation | 0.39          |       |       | 0.09            |       |       |

May 21, 2014

**GC-MS Analysis of Aromatic Materials Collected from Graphene Synthesis Furnace (BIUMS140507b).**

**Experimental.**

**GC-MS Analysis.** GC-MS analyses were performed on an Agilent 6890/5977A GC-MS system equipped with Agilent 30 m × 0.25 mm i.d. HP-5MS column (5% Phenyl/Methylpolysiloxane, 0.25 μm film thickness). The carrier gas was helium (99.999%) at constant flow rate of 1.2 mL/min. The GC conditions were as follows: injection volume 1.0 μL (Agilent auto-sampler G4513A); injector temperature 250 °C; splitless time 1.0 min; initial oven temperature 70 °C increased to 300 °C at a rate of 10 °C/min with 7 min hold time. MS was performed in the EI positive ion mode, using the electron energy of 70 eV. Transfer line temperature and ion source temperature were maintained at 280 and 300 °C, respectively. MS data were collected in full-scan mode (m/z 50–500) and analyzed with Agilent Chemstation software. Molecular identification was done with NIST MS Search v2.0 and verified by TAMI v3.9 (AVIV Analytical) software.<sup>1</sup>

<sup>1</sup> Tal Alon and Aviv Amirav; "Isotope Abundance Analysis Method and Software for Improved Sample Identification with the Supersonic GC-MS." *Rapid Commun. Mass Spectrom.* 20, 2579-2588 (2006).

**Quantitative data:**

TIC – Total Ion Count

RSIM - Reconstructed Single Ion Monitoring. (Used for specific molecular mass ion and can be used for quantity evaluation in case of high background noise or overlapping peaks of several materials).

Benzene and toluene wasn't detected due to solvent delay of 2 min.

RT – retention time

According to internal markers dioctyl phthalate (RT 20.3 min) and heptadecane (RT (12,4 min), the "NO" sample was at least 3 times concentrated than "WITH" sample. It should be mentioned that due to preconcentration of "NO" sample its background and S/N ratio are higher than in "WITH" sample.

| RT   | Internal marker       | "WITH" TIC Area | "NO" TIC Area | Ratio |
|------|-----------------------|-----------------|---------------|-------|
| 20.3 | dioctyl phtalate      | 91953311        | 312082392     | 3.39  |
| 12.4 | heptadecane<br>C17H36 | 3937190         | 11906319      | 3.02  |

Quantitative data for samples (not normalized):

| RT (min) | Mw (m/z) | Mol. formula | Substance                           | "WITH" TIC Area | "NO" TIC Area | "WITH" RSIM Area | "NO" RSIM Area |
|----------|----------|--------------|-------------------------------------|-----------------|---------------|------------------|----------------|
| 2.4-2.7  | 106      | C8H10        | Dimethyl benzenes                   | 119772048       | 36312990<br>2 | 40085727         | 10786336<br>8  |
| 3.2-4.1  | 120      | C9H12        | Tri methyl benzenes                 | 77235938        | 22399468<br>6 | 15015470         | 53287831       |
| 4.30     | 116      | C9H8         | Indene                              | 8058838         | NA*           | 2877108          | 60359          |
| 6.14     | 128      | C10H8        | Naphthalene                         | 93956887        | 6229997       | 63310896         | 1289037        |
| 9.36     | 154      | C12H10       | Biphenyl/<br>2-Vinylnaphthalene     | 2155889         | NA*           | 722644           | 16311          |
| 9.64     | 152      | C12H8        | Acenaphthylene                      | 9669133         | 2802267       | 5250484          | 88221          |
| 10.09    | 154      | C12H10       | Acenaphthene/<br>2-Vinylnaphthalene | 4839053         | NA**          | 600417           | 93278          |
| 11.26    | 166      | C13H10       | Fluorene/Phenalene                  | 13408541        | NA***         | 3118470          | 258975         |
| 12.03    | 166      | C13H10       | Fluorene/Phenalene                  | 3299802         | NA*           | 533883           | NA             |
| 13.49    | 178      | C14H10       | Phenanthrene                        | 41308201        | 19487185      | 18022644         | 2100983        |
| 13.60    | 178      | C14H10       | Anthracene                          | 20489781        | 15999355      | 7033541          | 290317         |
| 14.92    | 190      | C15H10       | 4,5-Methylenephenanthrene           | 8771197         | 6852270       | 2123110          | 321432         |
| 16.31    | 202      | C16H10       | Fluoranthene                        | 8881744         | 7226444       | 2968597          | 672615         |
| 16.82    | 202      | C16H10       | Pyrene                              | 14178519        | 13759915      | 5124378          | 1349595        |

NA\* - no peak was found due to high S/N

NA\*\* - Integration not available due to overlapping with stearic acid ester (fatty acid)

NA\*\*\* - Integration not available due to overlapping with phthalate derivatives (plasticizers)

You can normalize upper mentioned data with comparison to various factors. In my opinion, you can divide the "NO" data by 3, because it was concentrated during the handling process and according to internal markers. And then normalize all the values by Anthracene "with" area (20489781) or any other choice. I got the following results. The latter demonstrate larger presence of high aromatics in the "with" sample in comparison to "no" sample (especially naphthalene, ahenanthrene and anthracene).

| RT (min) | Mw (m/z) | Mol. formula | Substance                       | WITH normalized amount | NO normalized amount |
|----------|----------|--------------|---------------------------------|------------------------|----------------------|
| 2.4-2.7  | 106      | C8H10        | dimethyl benzenes               | 5.8                    | 5.9                  |
| 3.2-4.1  | 120      | C9H12        | trimethyl benzenes              | 3.8                    | 3.6                  |
| 4.30     | 116      | C9H8         | Indene                          | 0.4                    | NA*                  |
| 6.14     | 128      | C10H8        | Naphthalene                     | 4.6                    | 0.1                  |
| 9.36     | 154      | C12H10       | Biphenyl/2-Vinylnaphthalene     | 0.1                    | NA*                  |
| 9.64     | 152      | C12H8        | Acenaphthylene                  | 0.5                    | 0.0                  |
| 10.09    | 154      | C12H10       | Acenaphthene/2-Vinylnaphthalene | 0.2                    | NA**                 |
| 11.26    | 166      | C13H10       | Fluorene/Phenalene              | 0.7                    | NA***                |
| 12.03    | 166      | C13H10       | Fluorene/Phenalene              | 0.2                    | NA*                  |

|       |     |        |                           |     |     |
|-------|-----|--------|---------------------------|-----|-----|
| 13.49 | 178 | C14H10 | Phenanthrene              | 2.0 | 0.3 |
| 13.60 | 178 | C14H10 | Anthracene                | 1.0 | 0.3 |
| 14.92 | 190 | C15H10 | 4,5-Methylenephenanthrene | 0.4 | 0.1 |
| 16.31 | 202 | C16H10 | Fluoranthene              | 0.4 | 0.1 |
| 16.82 | 202 | C16H10 | Pyrene                    | 0.7 | 0.2 |

Alternatively, you can use RSIM data and compare "with" and "no" values (with/out 3 dilution factor) because it would allow you more selective comparison. However, you should not use normalization factors across different materials due to variability in molecular ion abundance. This results show that benzene derivatives found in both samples in same amounts, while higher aromatics are prevailing in "with" sample.

| RT (min) | Mw (m/z) | Mol. formula | Substance                       | RSIM ratio with/no |
|----------|----------|--------------|---------------------------------|--------------------|
| 2.4-2.7  | 106      | C8H10        | dimethyl benzenes               | 1.1                |
| 3.2-4.1  | 120      | C9H12        | trimethyl benzenes              | 0.8                |
| 4.3      | 116      | C9H8         | Indene                          | 143.0              |
| 6.14     | 128      | C10H8        | Naphthalene                     | 147.3              |
| 9.36     | 154      | C12H10       | Biphenyl/2-Vinylnaphthalene     | 132.9              |
| 9.64     | 152      | C12H8        | Acenaphthylene                  | 178.5              |
| 10.09    | 154      | C12H10       | Acenaphthene/2-Vinylnaphthalene | 19.3               |
| 11.26    | 166      | C13H10       | Fluorene/Phenalene              | 36.1               |
| 12.03    | 166      | C13H10       | Fluorene/Phenalene              | >150               |
| 13.49    | 178      | C14H10       | Phenanthrene                    | 25.7               |
| 13.6     | 178      | C14H10       | Anthracene                      | 72.7               |
| 14.92    | 190      | C15H10       | 4,5-Methylenephenanthrene       | 19.8               |
| 16.31    | 202      | C16H10       | Fluoranthene                    | 13.2               |
| 16.82    | 202      | C16H10       | Pyrene                          | 11.4               |

#### Figures:

All figures include TIC or RSIM of relevant substance and mass spectra used for molecular identification. In all figures blue lines - "NO" / black – "WITH".

Please notice that some materials are TIC and some RSIM. Let me know if you need additional variations.

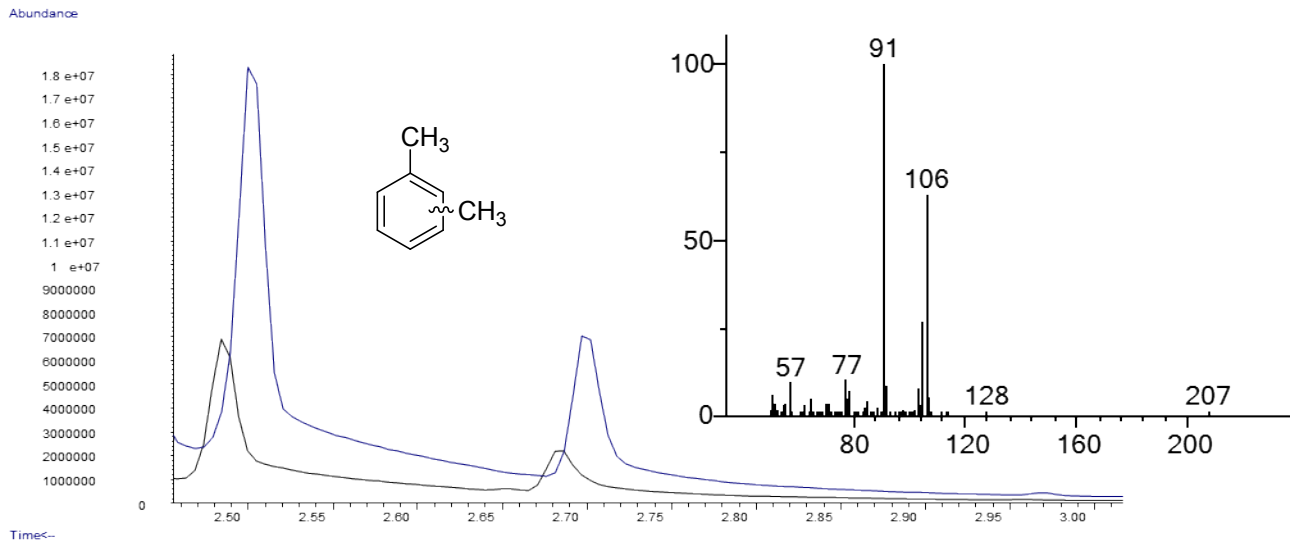

TIC RT: 2.4-2.7 min. C<sub>8</sub>H<sub>10</sub> - dimethyl benzenes

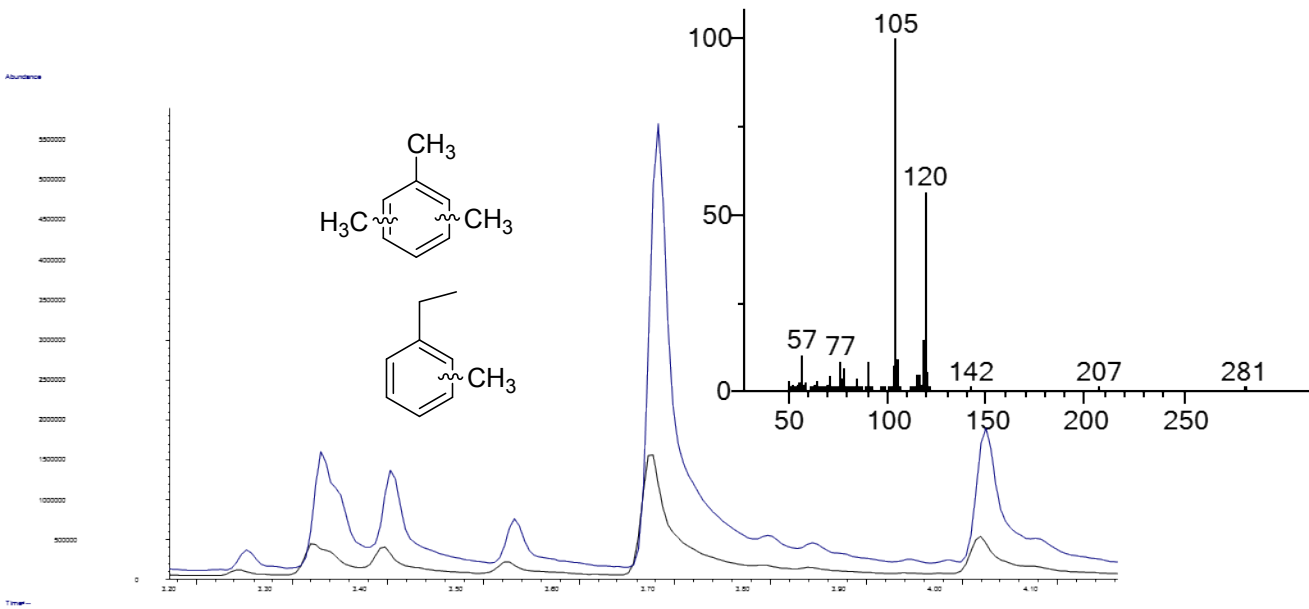

TIC RT: 3.2-4.1 min. C<sub>9</sub>H<sub>12</sub> - trimethyl benzenes / Ethyl methyl benzenes

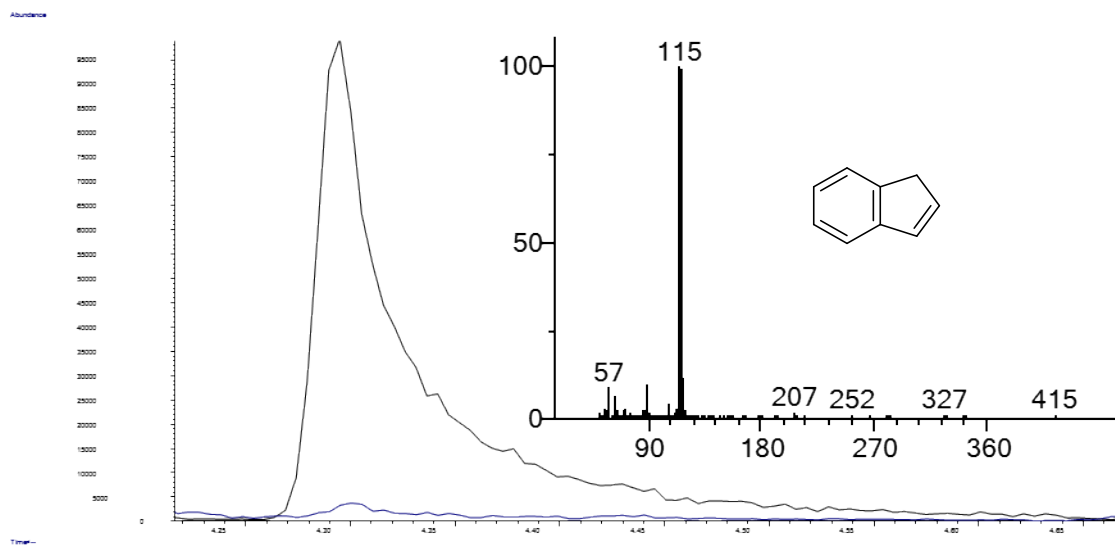

RSIM RT: 4.30 min. C<sub>9</sub>H<sub>8</sub> - Indene

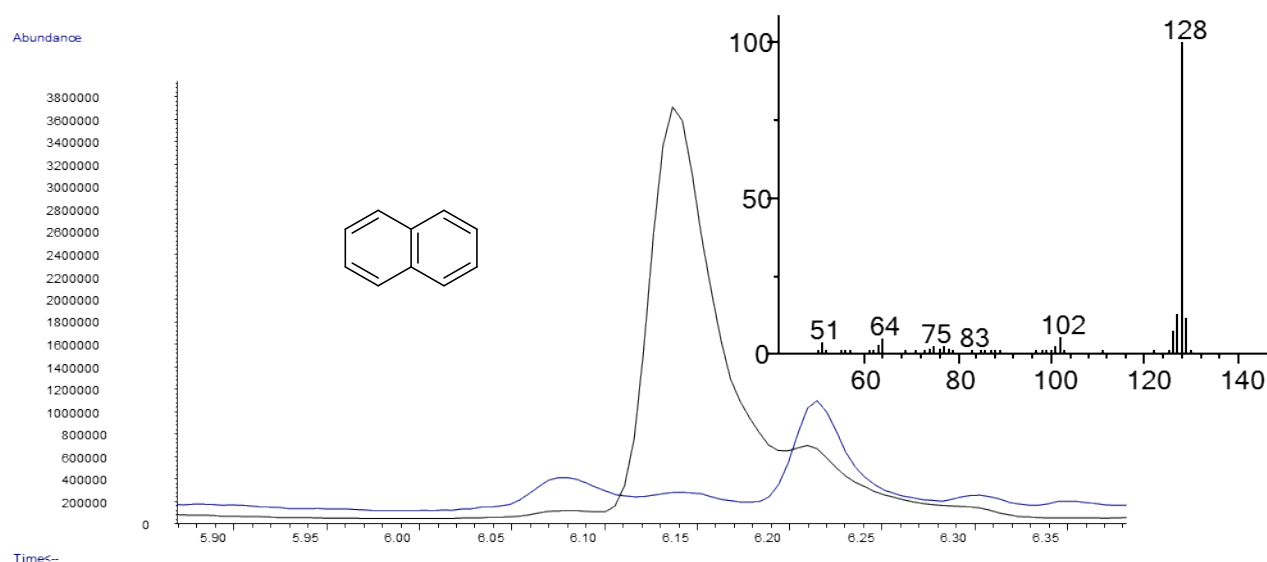

TIC RT: RT: 6.14 min. C<sub>10</sub>H<sub>8</sub> - Naphthalene

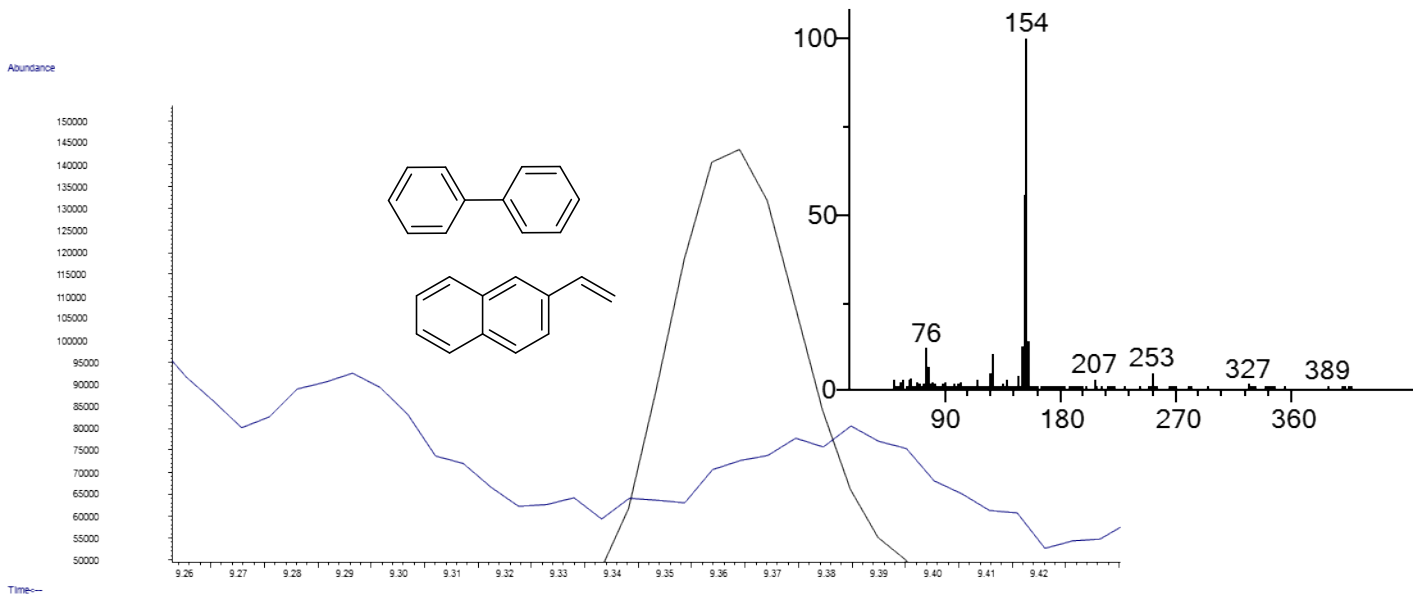

TIC RT: RT: 9.36 min. C<sub>12</sub>H<sub>10</sub> – Biphenyl/ 2-Vinylnaphthalene

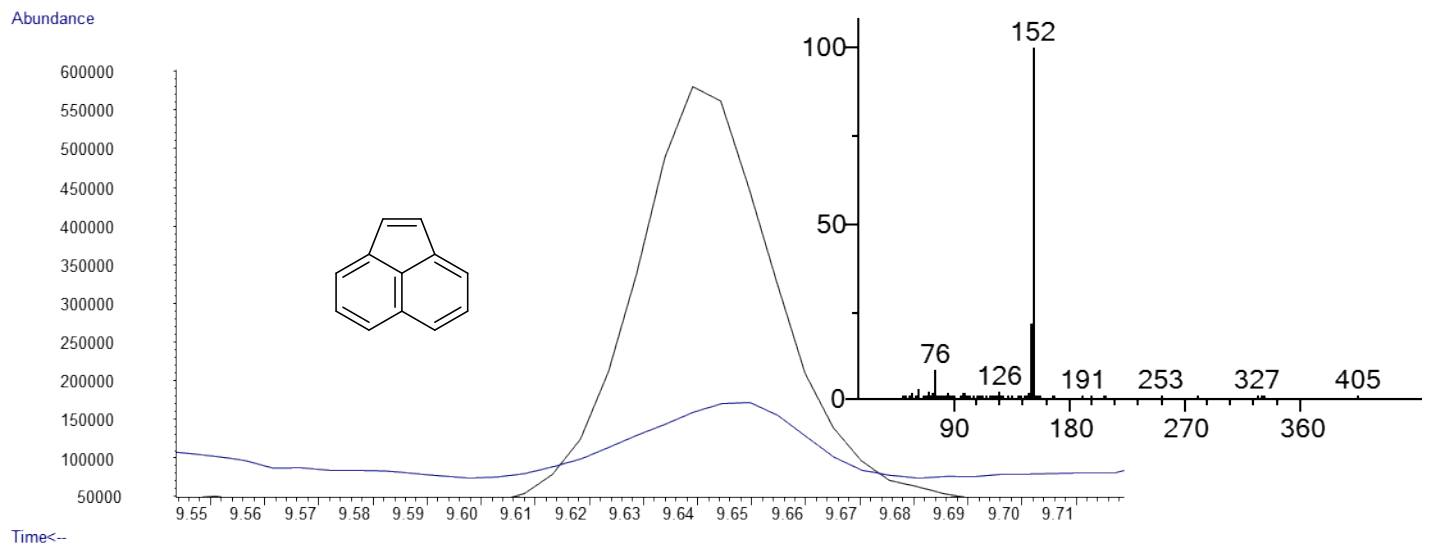

TIC RT: 9.64 min. C<sub>12</sub>H<sub>8</sub> – Acenaphthylene

Abundance

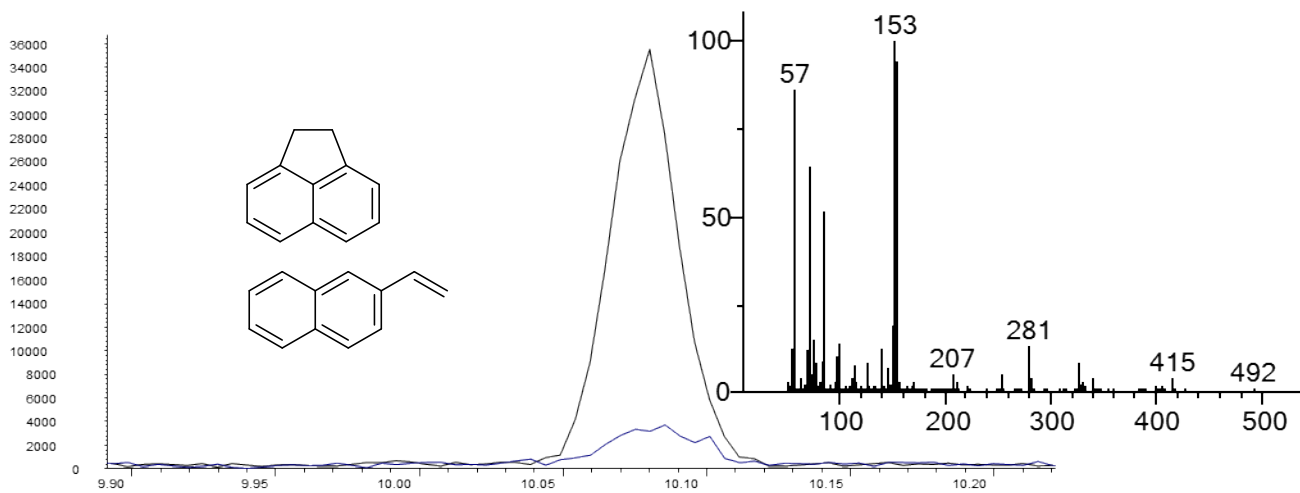

RSIM RT: 10.09 min. C<sub>12</sub>H<sub>10</sub> – Acenaphthene / 2-Vinylnaphthalene

Abundance

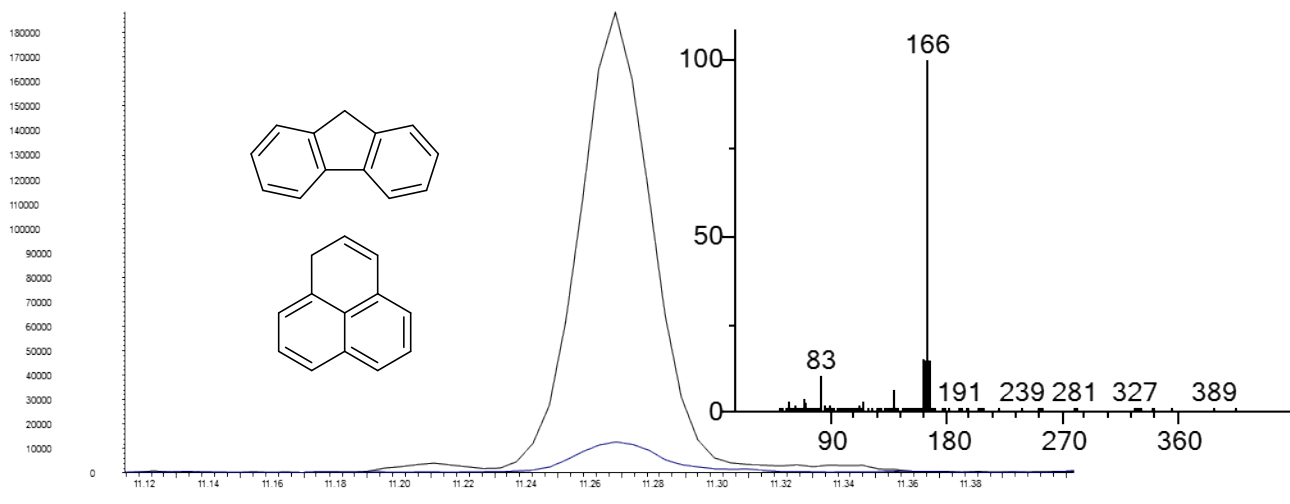

RSIM RT: 11.26 min. C<sub>13</sub>H<sub>10</sub> - Fluorene/Phenylene



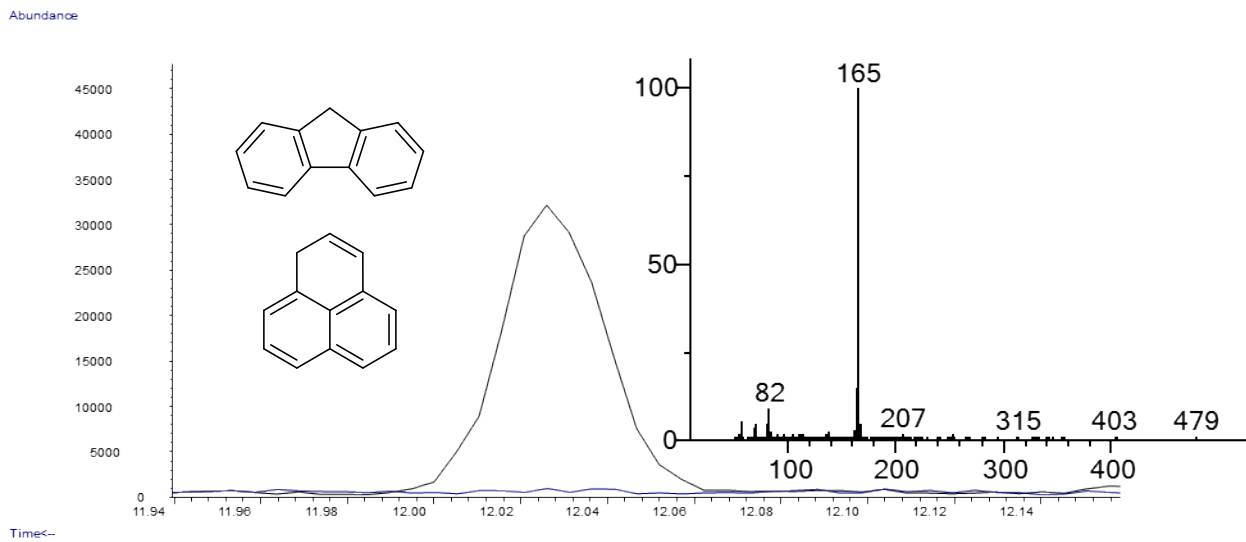

RSIM RT: RT: 12.03 min. C<sub>13</sub>H<sub>10</sub> - Fluorene/Phenylene

Abundance

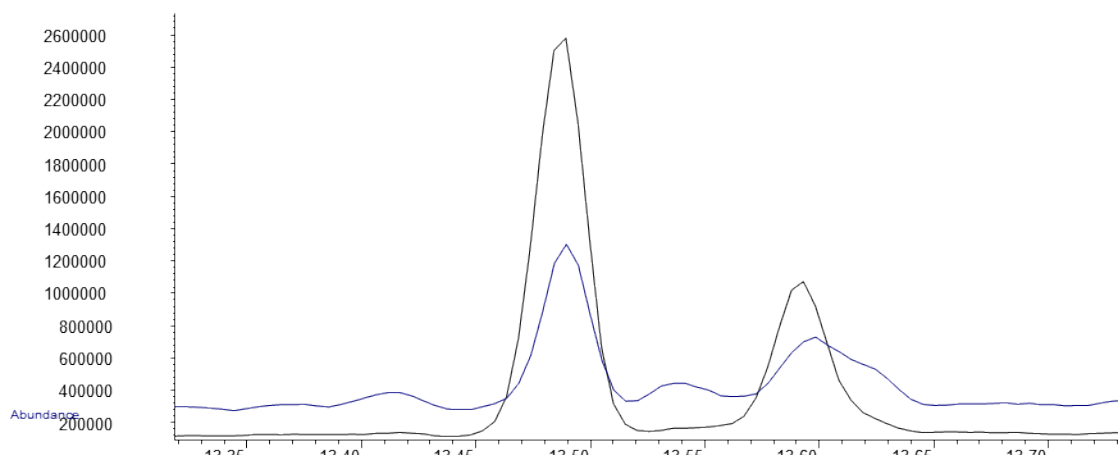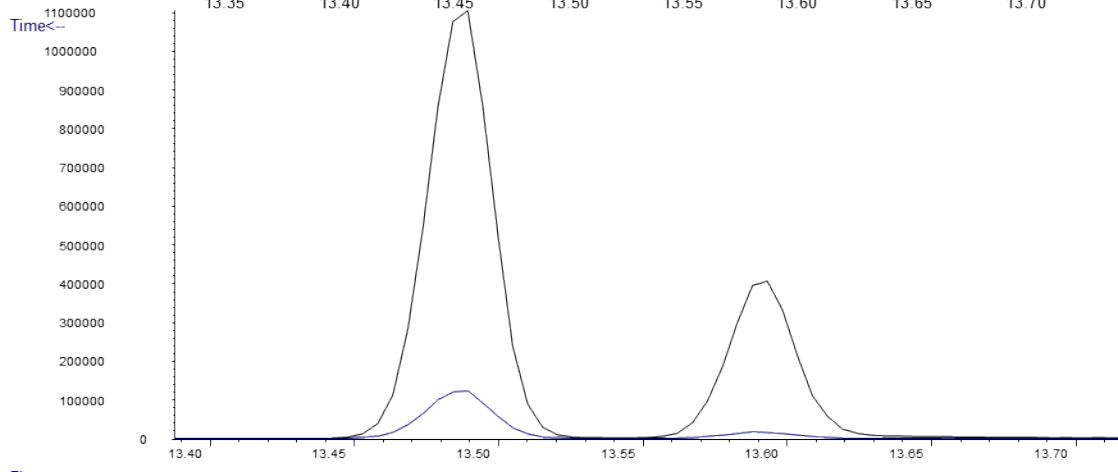

Time--

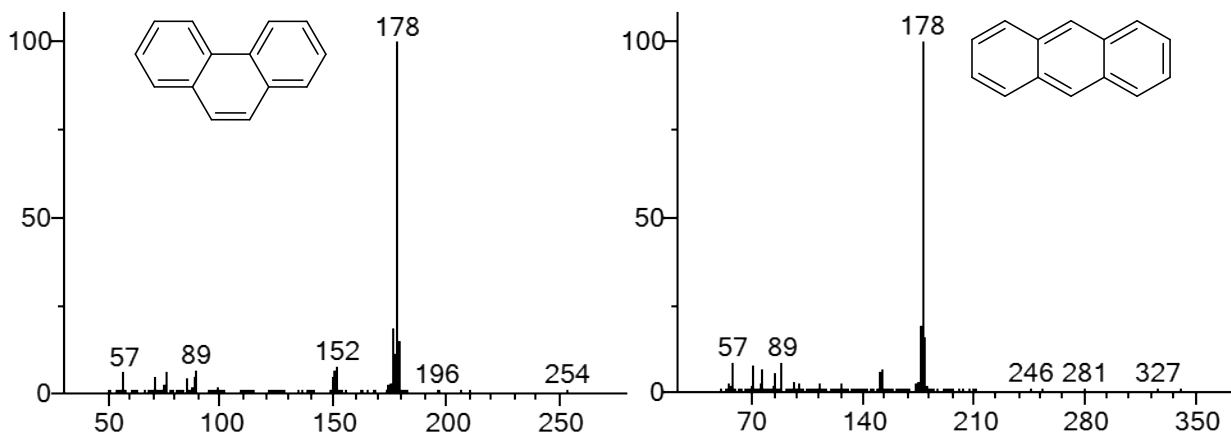

TIC (top) & RSIM (bottom) of C<sub>14</sub>H<sub>10</sub>: Phenanthrene (RT 13.49 min) and Anthracene (RT 13.60 min)

Abundance

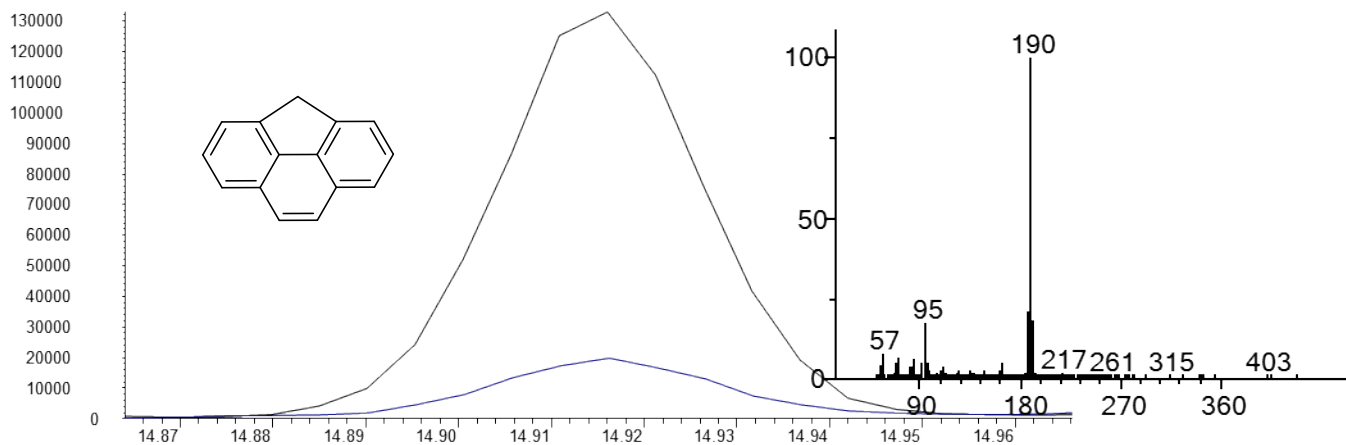

Time<--

RSIM RT: 14.92min. C<sub>15</sub>H<sub>10</sub> - 4,5-Methylenepheneanthrene

Abundance

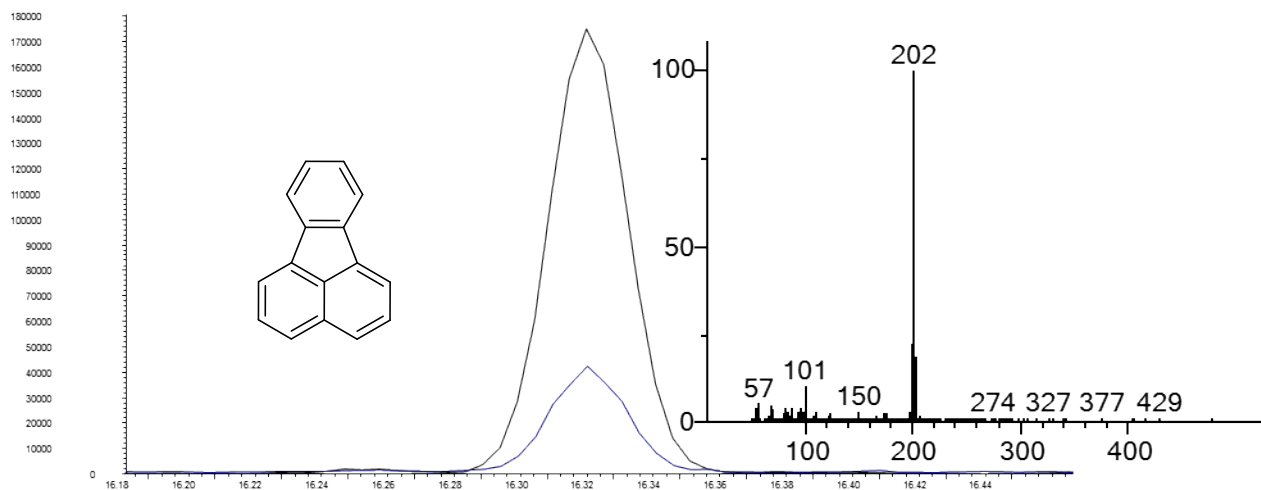

Time<--

RSIM RT: 16.31 min. C<sub>16</sub>H<sub>10</sub> – Fluoranthene

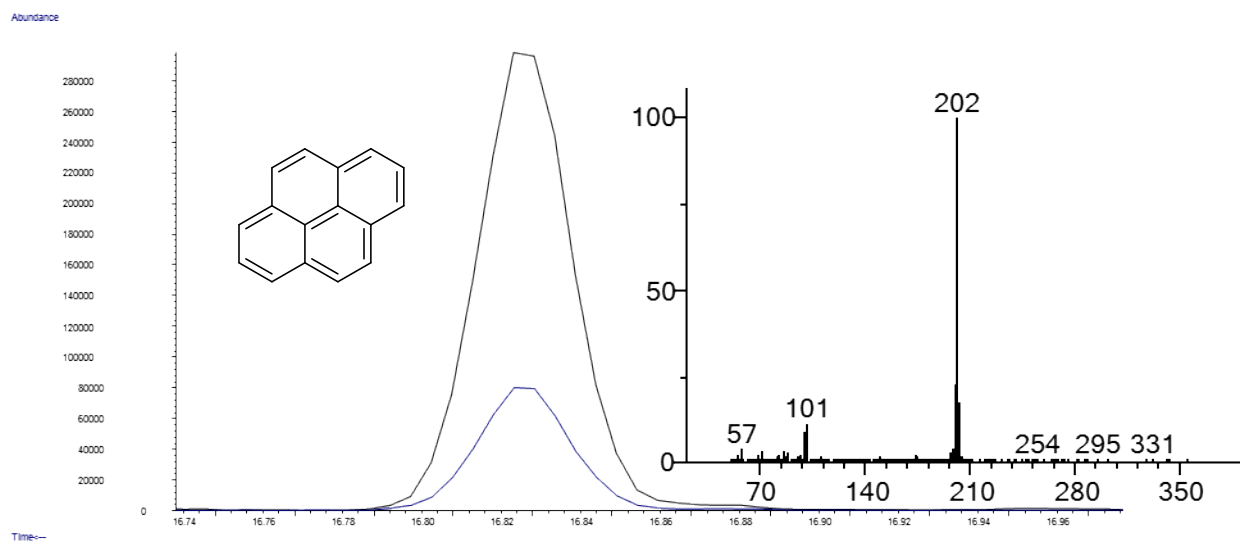

RSIM RT: 16.82 min. C<sub>16</sub>H<sub>10</sub> - Pyrene
